# Supplementary material
Source: ML conference proceedings conference paper supplement (https://openaccess.thecvf.com/content/CVPR2022/html/Liu_Learning_Memory-Augmented_Unidirectional_CVPR_2022_paper.html)
Supplement: Supplementary file 1 [file Liu_Learning_Memory-Augmented_Unidirectional_CVPR_2022_supplemental.pdf]

# Learning Memory-Augmented Unidirectional Metrics for Cross-modality Person Re-identification

## 1. The impact of unidirectional metric loss

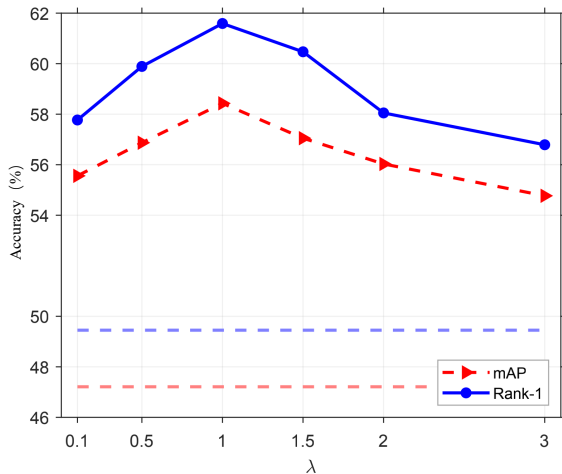

Figure 1. The results of parameter analysis for  $\lambda$  of Eq. 3 in manuscript. We evaluate the proposed MAUM on SYSU-MM01 under *all-search* test protocol. Rank-1 and mAP accuracy are reported.

The unidirectional metric loss is a key component of MAUM.  $\lambda$  (in Eq. 3) controls the strength of unidirectional metric loss in  $\mathcal{L}_{\text{Total}}$  (Eq. 3). Fig. 1 experimentally analyzes the impact of  $\lambda$  on SYSU-MM01. We vary the  $\lambda$  from 0.1 to 3. We make two observations as follows.

First, when  $\lambda$  is very small, for example  $\lambda = 0.1$ , the unidirectional metric loss makes little contribution to the embedding optimization. The modality-specific loss plays the dominant role in embedding learning. Even so MAUM also obtains the better performance than baseline. It indicates that cross-modality re-ID benefits from the unidirectional metric loss.

Second, as  $\lambda$  increases, the performance of MAUM gradually increases to the maximum (when  $\lambda$  is 1.0) and then decreases. When  $\lambda$  is too large, the unidirectional metric loss makes more contribution than modality-specific loss in embedding learning and shrinks the performance of MAUM.

Based on the above observations, we select  $\lambda = 1$  in all our experiments, which balances the modality-specific loss and cross-modality unidirectional metric loss in Eq. 3.
